# Supplementary material
Source: MDPI journal article supplement (https://www.mdpi.com/2673-7167/1/2/13)
Supplement: s1 [file s1]

**Unusual *para*-substituent effects on the intramolecular hydrogen bond in hydrazone-based switches: insights from chemical landscape analysis and DFT**

Vesselina Paskaleva<sup>1</sup>, Stefan Dobrev<sup>2</sup>, Nikolay Kochev<sup>1</sup>, Silvia Angelova<sup>2\*</sup>, Liudmil Antonov<sup>3\*</sup>

<sup>1</sup> *Faculty of Chemistry, University of Plovdiv “Paisii Hilendarski”, Plovdiv, Bulgaria*

<sup>2</sup> *Institute of Optical Materials and Technologies “Acad. J. Malinowski”, Bulgarian Academy of Sciences, 1113 Sofia, Bulgaria*

<sup>3</sup> *Institute of Electronics “Academician Emil Djakov”, Bulgarian Academy of Sciences, 1784 Sofia, Bulgaria*

vessy@uni-plovdiv.net; <https://orcid.org/0000-0002-0560-4511>

sdobrev@iomt.bas.bg; <https://orcid.org/0000-0001-9535-3439>

nick@uni-plovdiv.net; <https://orcid.org/0000-0001-6547-3675>

sea@iomt.bas.bg; <https://orcid.org/0000-0003-4717-8028>

lantonov@tautomer.eu; <https://orcid.org/0000-0003-0520-1517>

M062X/6-31+G(d,p)

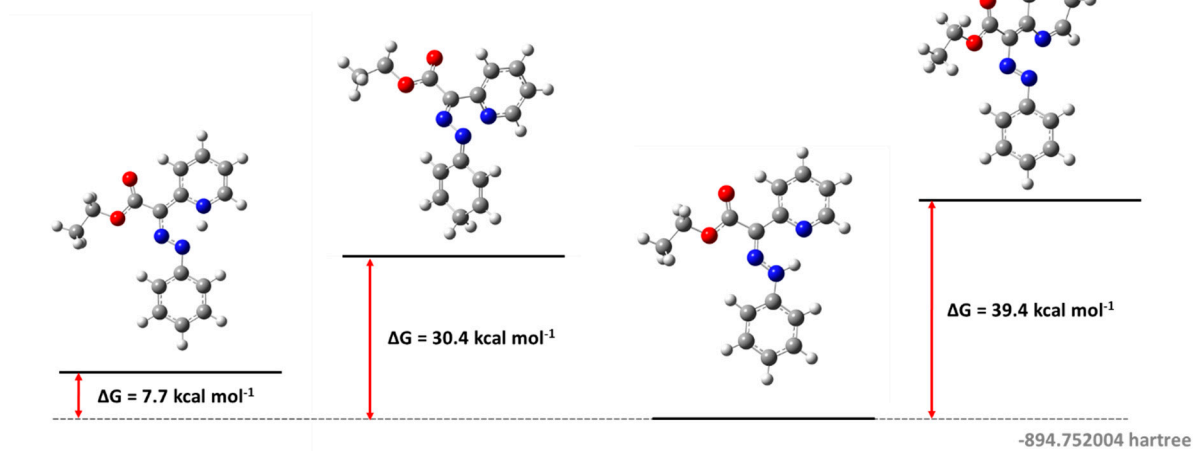

**Figure S1.** Relative energies of selected conventional and ring-chain tautomers of compound 1.

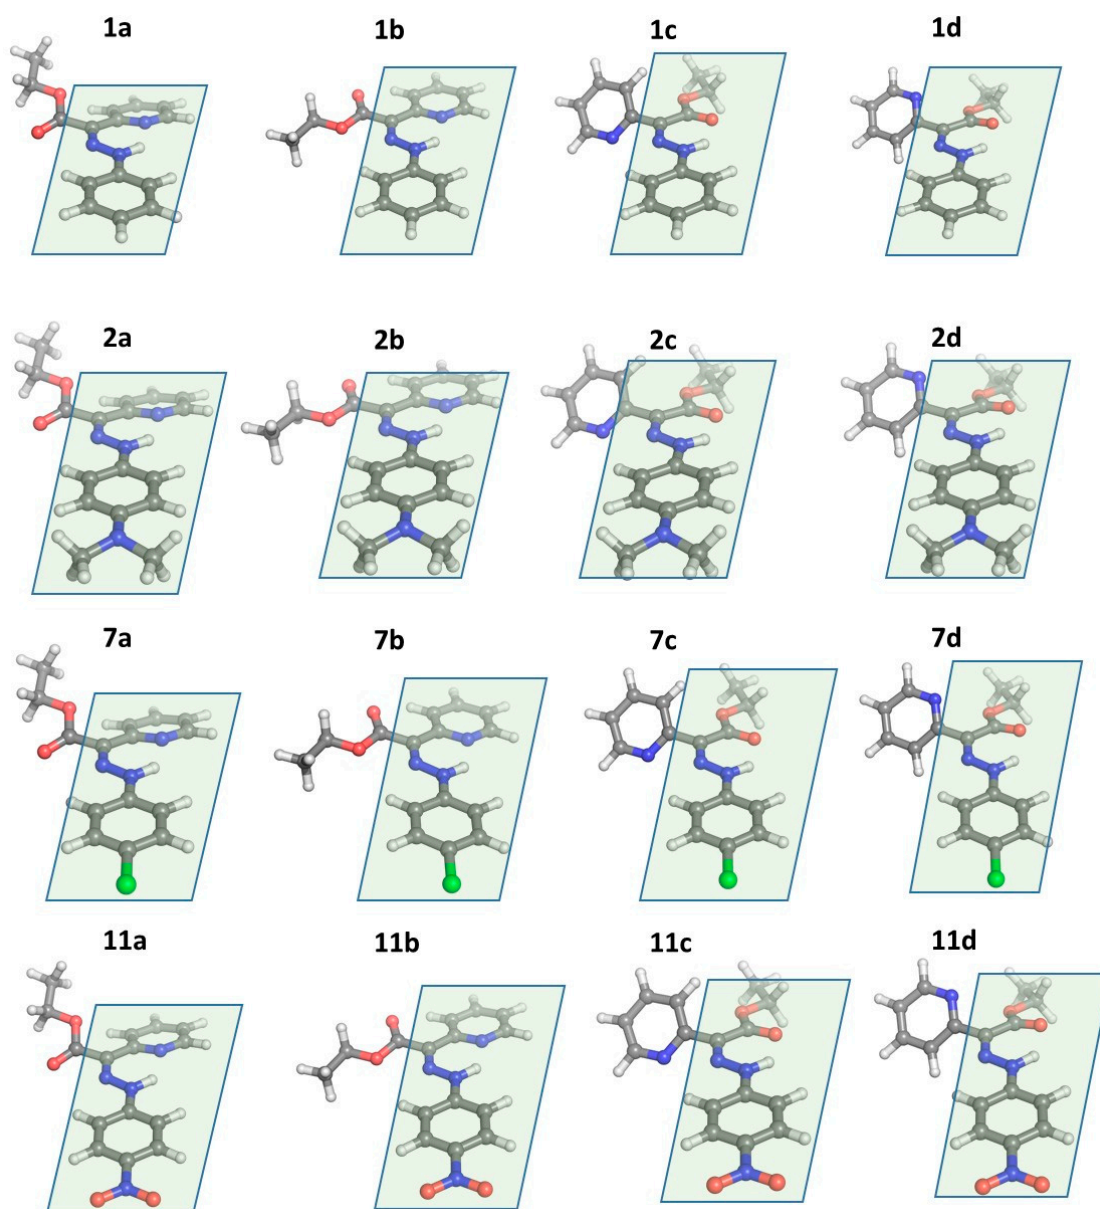

**Figure S2.** Optimized structures of compounds **1-11**.

**Table S1.** Gibbs energy differences (kcal mol<sup>-1</sup>) in the gas phase ( $\Delta G^1$ ) and in acetonitrile ( $\Delta G^{36}$ ) calculated for compounds **1-11**.

| Compound  | M062X/6-31+G(d,p) |               | MN12-SX/6-31+G(d,p) |               |
|-----------|-------------------|---------------|---------------------|---------------|
|           | $\epsilon=1$      | $\epsilon=36$ | $\epsilon=1$        | $\epsilon=36$ |
| <b>1a</b> | 2.54              | 1.11*         | 2.51                | 1.32*         |
| <b>1b</b> | 0.00              | 0.00*         | 0.00                | 0.00*         |
| <b>1c</b> | 2.93              | 2.09*         | 2.82                | 2.35*         |
| <b>1d</b> | 1.09              | 1.49*         | 1.17                | 2.10*         |
| <b>2a</b> | 2.56              | 0.85          | 2.35                | 1.62          |
| <b>2b</b> | 0.00              | 0.00          | 0.00                | 0.00          |
| <b>2c</b> | 3.43              | 1.65          | 1.49                | 1.70          |
| <b>2d</b> | 1.99              | 1.01          | 0.62                | 1.79          |
|           |                   |               |                     |               |

|            |      |      |      |      |
|------------|------|------|------|------|
| <b>3a</b>  | 2.46 | 0.75 | 2.77 | 1.32 |
| <b>3b</b>  | 0.00 | 0.00 | 0.00 | 0.00 |
| <b>3c</b>  | 2.97 | 1.41 | 2.74 | 2.12 |
| <b>3d</b>  | 1.51 | 0.61 | 1.90 | 1.75 |
|            |      |      |      |      |
| <b>4a</b>  | 1.99 | 1.09 | 3.11 | 1.88 |
| <b>4b</b>  | 0.00 | 0.00 | 0.00 | 0.00 |
| <b>4c</b>  | 2.71 | 1.12 | 2.64 | 1.01 |
| <b>4d</b>  | 1.29 | 2.15 | 2.23 | 1.48 |
|            |      |      |      |      |
| <b>5a</b>  | 1.99 | 0.69 | 2.33 | 1.84 |
| <b>5b</b>  | 0.00 | 0.00 | 0.00 | 0.00 |
| <b>5c</b>  | 2.78 | 1.98 | 1.24 | 1.58 |
| <b>5d</b>  | 1.67 | 1.03 | 0.99 | 2.03 |
|            |      |      |      |      |
| <b>6a</b>  | 2.45 | 2.04 | 2.32 | 0.80 |
| <b>6b</b>  | 0.00 | 0.00 | 0.00 | 0.00 |
| <b>6c</b>  | 2.79 | 1.58 | 2.52 | 2.12 |
| <b>6d</b>  | 1.14 | 0.82 | 1.51 | 1.67 |
|            |      |      |      |      |
| <b>7a</b>  | 2.32 | 0.83 | 2.46 | 1.06 |
| <b>7b</b>  | 0.00 | 0.00 | 0.00 | 0.00 |
| <b>7c</b>  | 2.61 | 2.20 | 2.39 | 1.97 |
| <b>7d</b>  | 1.10 | 1.14 | 1.24 | 1.30 |
|            |      |      |      |      |
| <b>8a</b>  | 2.31 | 1.76 | 2.35 | 1.03 |
| <b>8b</b>  | 0.00 | 0.00 | 0.00 | 1.00 |
| <b>8c</b>  | 2.76 | 3.03 | 2.33 | 2.12 |
| <b>8d</b>  | 1.43 | 1.99 | 1.14 | 1.48 |
|            |      |      |      |      |
| <b>9a</b>  | 2.76 | 1.11 | 2.29 | 0.64 |
| <b>9b</b>  | 0.00 | 0.00 | 0.00 | 0.00 |
| <b>9c</b>  | 2.97 | 1.93 | 2.95 | 2.07 |
| <b>9d</b>  | 1.19 | 0.67 | 1.45 | 1.32 |
|            |      |      |      |      |
| <b>10a</b> | 1.90 | 0.94 | -    | -    |
| <b>10b</b> | 0.00 | 0.00 | -    | -    |
| <b>10c</b> | 2.51 | 2.21 | -    | -    |
| <b>10d</b> | 1.17 | 1.01 | -    | -    |
|            |      |      |      |      |
| <b>11a</b> | 1.92 | 1.05 | 2.67 | 1.93 |
| <b>11b</b> | 0.00 | 0.00 | 0.00 | 0.00 |
| <b>11c</b> | 2.69 | 2.06 | 3.23 | 3.13 |
| <b>11d</b> | 0.99 | 1.34 | 1.78 | 2.18 |

\* S. Angelova, V. Paskaleva, N. Kochev, L. Antonov, DFT study of hydrazone-based molecular switches: the effect of different stators on the on/off state distribution, Mol. Phys. 117 (2019), <https://doi.org/10.1080/00268976.2018.1548717>.

**Table S2.** List of generated tautomers for unsubstituted and substituted (substituents H, N(CH<sub>3</sub>)<sub>2</sub>, NO<sub>2</sub>) structures and their calculated rapid partial charges with Gasteiger Marsili and MMFF94 methods.

| Structure                                                                         | Substituent R | Tautomer № | Atom indices | Gasteiger Marsili Partial Charges | MMFF94 Partial Charges |
|-----------------------------------------------------------------------------------|---------------|------------|--------------|-----------------------------------|------------------------|
| 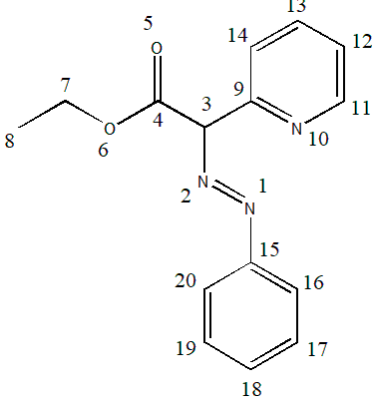 | H             | 1          | 1 N          | -0.154                            | -0.179                 |
|                                                                                   |               |            | 2 N          | -0.168                            | -0.246                 |
|                                                                                   |               |            | 3 C          | 0.198                             | 0.451                  |
|                                                                                   |               |            | 4 C          | 0.294                             | 0.659                  |
|                                                                                   |               |            | 5 O          | -0.263                            | -0.57                  |
|                                                                                   |               |            | 6 O          | -0.314                            | -0.43                  |
|                                                                                   |               |            | 7 C          | 0.054                             | 0.28                   |
|                                                                                   |               |            | 8 C          | -0.041                            | 0                      |
|                                                                                   |               |            | 9 C          | 0.077                             | 0.167                  |
|                                                                                   |               |            | 10 N         | -0.258                            | -0.62                  |
|                                                                                   |               |            | 11 C         | 0.028                             | 0.16                   |
|                                                                                   |               |            | 12 C         | -0.044                            | -0.15                  |
|                                                                                   |               |            | 13 C         | -0.059                            | -0.15                  |
|                                                                                   |               |            | 14 C         | -0.038                            | -0.15                  |
|                                                                                   |               |            | 15 C         | 0.086                             | 0.179                  |
|                                                                                   |               |            | 16 C         | -0.035                            | -0.15                  |
|                                                                                   |               |            | 17 C         | -0.06                             | -0.15                  |
|                                                                                   |               |            | 18 C         | -0.062                            | -0.15                  |
|                                                                                   |               |            | 19 C         | -0.06                             | -0.15                  |
|                                                                                   |               |            | 20 C         | -0.035                            | -0.15                  |
|                                                                                   | H             | 2          | 1 N          | -0.15                             | -0.179                 |
|                                                                                   |               |            | 2 N          | -0.143                            | -0.171                 |
|                                                                                   |               |            | 3 C          | 0.166                             | 0.163                  |
|                                                                                   |               |            | 4 C          | 0.211                             | 0.153                  |
|                                                                                   |               |            | 5 O          | -0.339                            | -0.527                 |

|                                                                                     |   |   |      |        |        |
|-------------------------------------------------------------------------------------|---|---|------|--------|--------|
| 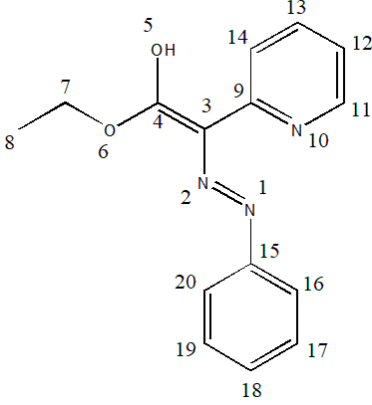   |   |   | 6 O  | -0.324 | -0.357 |
|                                                                                     |   |   | 7 C  | 0.053  | 0.28   |
|                                                                                     |   |   | 8 C  | -0.041 | 0      |
|                                                                                     |   |   | 9 C  | 0.095  | 0.318  |
|                                                                                     |   |   | 10 N | -0.254 | -0.62  |
|                                                                                     |   |   | 11 C | 0.028  | 0.16   |
|                                                                                     |   |   | 12 C | -0.044 | -0.15  |
|                                                                                     |   |   | 13 C | -0.058 | -0.15  |
|                                                                                     |   |   | 14 C | -0.034 | -0.15  |
|                                                                                     |   |   | 15 C | 0.086  | 0.179  |
|                                                                                     |   |   | 16 C | -0.035 | -0.15  |
|                                                                                     |   |   | 17 C | -0.06  | -0.15  |
|                                                                                     |   |   | 18 C | -0.062 | -0.15  |
|                                                                                     |   |   | 19 C | -0.06  | -0.15  |
|                                                                                     |   |   | 20 C | -0.035 | -0.15  |
|  | H | 3 | 1 N  | -0.15  | -0.179 |
|                                                                                     |   |   | 2 N  | -0.142 | -0.171 |
|                                                                                     |   |   | 3 C  | 0.176  | 0.185  |
|                                                                                     |   |   | 4 C  | 0.315  | 0.706  |
|                                                                                     |   |   | 5 O  | -0.258 | -0.57  |
|                                                                                     |   |   | 6 O  | -0.311 | -0.43  |
|                                                                                     |   |   | 7 C  | 0.054  | 0.28   |
|                                                                                     |   |   | 8 C  | -0.041 | 0      |
|                                                                                     |   |   | 9 C  | 0.053  | 0.1    |
|                                                                                     |   |   | 10 N | -0.263 | -0.6   |
|                                                                                     |   |   | 11 C | -0.018 | -0.05  |
|                                                                                     |   |   | 12 C | -0.051 | -0.15  |
|                                                                                     |   |   | 13 C | -0.059 | -0.15  |
|                                                                                     |   |   | 14 C | -0.041 | -0.15  |
|                                                                                     |   |   | 15 C | 0.086  | 0.179  |
|                                                                                     |   |   | 16 C | -0.035 | -0.15  |

|                                                                                   |   |   |      |        |        |
|-----------------------------------------------------------------------------------|---|---|------|--------|--------|
|                                                                                   |   |   | 17 C | -0.06  | -0.15  |
|                                                                                   |   |   | 18 C | -0.062 | -0.15  |
|                                                                                   |   |   | 19 C | -0.06  | -0.15  |
|                                                                                   |   |   | 20 C | -0.035 | -0.15  |
| 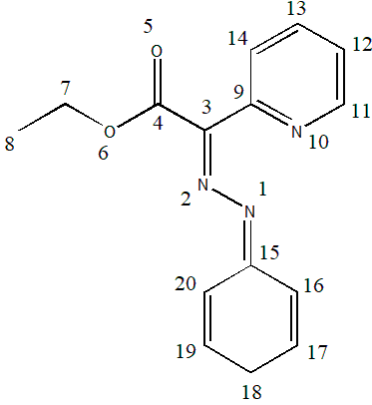 | H | 4 | 1 N  | -0.15  | -0.45  |
|                                                                                   |   |   | 2 N  | -0.141 | -0.45  |
|                                                                                   |   |   | 3 C  | 0.183  | 0.482  |
|                                                                                   |   |   | 4 C  | 0.316  | 0.72   |
|                                                                                   |   |   | 5 O  | -0.258 | -0.57  |
|                                                                                   |   |   | 6 O  | -0.311 | -0.43  |
|                                                                                   |   |   | 7 C  | 0.054  | 0.28   |
|                                                                                   |   |   | 8 C  | -0.041 | 0      |
|                                                                                   |   |   | 9 C  | 0.097  | 0.278  |
|                                                                                   |   |   | 10 N | -0.254 | -0.62  |
|                                                                                   |   |   | 11 C | 0.028  | 0.16   |
|                                                                                   |   |   | 12 C | -0.044 | -0.15  |
|                                                                                   |   |   | 13 C | -0.058 | -0.15  |
|                                                                                   |   |   | 14 C | -0.034 | -0.15  |
|                                                                                   |   |   | 15 C | 0.085  | 0.421  |
|                                                                                   |   |   | 16 C | -0.038 | -0.136 |
|                                                                                   |   |   | 17 C | -0.078 | -0.288 |
|                                                                                   |   |   | 18 C | -0.016 | 0.276  |
|                                                                                   |   |   | 19 C | -0.078 | -0.288 |
|                                                                                   |   |   | 20 C | -0.038 | -0.136 |
|                                                                                   | H | 5 | 1 N  | -0.182 | -0.458 |
|                                                                                   |   |   | 2 N  | -0.188 | -0.492 |
|                                                                                   |   |   | 3 C  | 0.175  | 0.482  |
|                                                                                   |   |   | 4 C  | 0.315  | 0.72   |
|                                                                                   |   |   | 5 O  | -0.258 | -0.57  |
|                                                                                   |   |   | 6 O  | -0.311 | -0.43  |
|                                                                                   |   |   | 7 C  | 0.054  | 0.28   |

|  |   |   |      |        |        |
|--|---|---|------|--------|--------|
|  |   |   | 8 C  | -0.041 | 0      |
|  |   |   | 9 C  | 0.096  | 0.278  |
|  |   |   | 10 N | -0.254 | -0.62  |
|  |   |   | 11 C | 0.028  | 0.16   |
|  |   |   | 12 C | -0.044 | -0.15  |
|  |   |   | 13 C | -0.058 | -0.15  |
|  |   |   | 14 C | -0.034 | -0.15  |
|  |   |   | 15 C | 0.036  | 0.1    |
|  |   |   | 16 C | -0.042 | -0.15  |
|  |   |   | 17 C | -0.06  | -0.15  |
|  |   |   | 18 C | -0.062 | -0.15  |
|  |   |   | 19 C | -0.06  | -0.15  |
|  | H | 6 | 20 C | -0.042 | -0.15  |
|  |   |   | 1 N  | -0.15  | -0.179 |
|  |   |   | 2 N  | -0.141 | -0.171 |
|  |   |   | 3 C  | 0.183  | 0.185  |
|  |   |   | 4 C  | 0.316  | 0.706  |
|  |   |   | 5 O  | -0.258 | -0.57  |
|  |   |   | 6 O  | -0.311 | -0.43  |
|  |   |   | 7 C  | 0.054  | 0.28   |
|  |   |   | 8 C  | -0.041 | 0      |
|  |   |   | 9 C  | 0.096  | 0.171  |
|  |   |   | 10 N | -0.258 | -0.621 |
|  |   |   | 11 C | 0.009  | 0.329  |
|  |   |   | 12 C | 0.001  | 0.199  |
|  |   |   | 13 C | -0.077 | -0.288 |
|  |   |   | 14 C | -0.038 | -0.15  |
|  |   |   | 15 C | 0.086  | 0.179  |
|  |   |   | 16 C | -0.035 | -0.15  |
|  |   |   | 17 C | -0.06  | -0.15  |
|  |   |   | 18 C | -0.062 | -0.15  |



|                                                                                     |   |   |      |        |        |
|-------------------------------------------------------------------------------------|---|---|------|--------|--------|
|                                                                                     |   |   | 19 C | -0.06  | -0.15  |
|                                                                                     |   |   | 20 C | -0.035 | -0.15  |
| 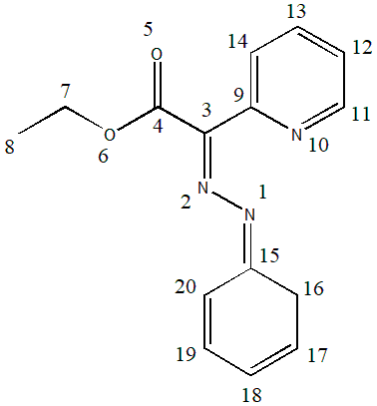   | H | 7 | 1 N  | -0.154 | -0.45  |
|                                                                                     |   |   | 2 N  | -0.142 | -0.45  |
|                                                                                     |   |   | 3 C  | 0.183  | 0.482  |
|                                                                                     |   |   | 4 C  | 0.316  | 0.72   |
|                                                                                     |   |   | 5 O  | -0.258 | -0.57  |
|                                                                                     |   |   | 6 O  | -0.311 | -0.43  |
|                                                                                     |   |   | 7 C  | 0.054  | 0.28   |
|                                                                                     |   |   | 8 C  | -0.041 | 0      |
|                                                                                     |   |   | 9 C  | 0.097  | 0.278  |
|                                                                                     |   |   | 10 N | -0.254 | -0.62  |
|                                                                                     |   |   | 11 C | 0.028  | 0.16   |
|                                                                                     |   |   | 12 C | -0.044 | -0.15  |
|                                                                                     |   |   | 13 C | -0.058 | -0.15  |
|                                                                                     |   |   | 14 C | -0.034 | -0.15  |
|                                                                                     |   |   | 15 C | 0.067  | 0.375  |
|                                                                                     |   |   | 16 C | -0.038 | -0.136 |
|                                                                                     |   |   | 17 C | -0.06  | -0.15  |
|                                                                                     |   |   | 18 C | -0.066 | -0.15  |
|                                                                                     |   |   | 19 C | -0.078 | -0.288 |
|                                                                                     |   |   | 20 C | 0.01   | 0.199  |
|  | H | 8 | 1 N  | -0.15  | -0.179 |
|                                                                                     |   |   | 2 N  | -0.142 | -0.171 |
|                                                                                     |   |   | 3 C  | 0.179  | 0.185  |
|                                                                                     |   |   | 4 C  | 0.316  | 0.706  |
|                                                                                     |   |   | 5 O  | -0.258 | -0.57  |
|                                                                                     |   |   | 6 O  | -0.311 | -0.43  |
|                                                                                     |   |   | 7 C  | 0.054  | 0.28   |
|                                                                                     |   |   | 8 C  | -0.041 | 0      |
|                                                                                     |   |   | 9 C  | 0.078  | 0.033  |

|  |                                  |   |      |        |        |
|--|----------------------------------|---|------|--------|--------|
|  |                                  |   | 10 N | -0.258 | -0.621 |
|  |                                  |   | 11 C | 0.027  | 0.376  |
|  |                                  |   | 12 C | -0.047 | -0.136 |
|  |                                  |   | 13 C | -0.077 | -0.288 |
|  |                                  |   | 14 C | 0.01   | 0.276  |
|  |                                  |   | 15 C | 0.086  | 0.179  |
|  |                                  |   | 16 C | -0.035 | -0.15  |
|  |                                  |   | 17 C | -0.06  | -0.15  |
|  |                                  |   | 18 C | -0.062 | -0.15  |
|  |                                  |   | 19 C | -0.06  | -0.15  |
|  |                                  |   | 20 C | -0.035 | -0.15  |
|  | N(CH <sub>3</sub> ) <sub>2</sub> | 1 | 1 N  | -0.154 | -0.179 |
|  |                                  |   | 2 N  | -0.168 | -0.246 |
|  |                                  |   | 3 C  | 0.198  | 0.451  |
|  |                                  |   | 4 C  | 0.294  | 0.659  |
|  |                                  |   | 5 O  | -0.263 | -0.57  |
|  |                                  |   | 6 O  | -0.314 | -0.43  |
|  |                                  |   | 7 C  | 0.054  | 0.28   |
|  |                                  |   | 8 C  | -0.041 | 0      |
|  |                                  |   | 9 C  | 0.077  | 0.167  |
|  |                                  |   | 10 N | -0.258 | -0.62  |
|  |                                  |   | 11 C | 0.028  | 0.16   |
|  |                                  |   | 12 C | -0.044 | -0.15  |
|  |                                  |   | 13 C | -0.059 | -0.15  |
|  |                                  |   | 14 C | -0.038 | -0.15  |
|  |                                  |   | 15 C | 0.086  | 0.179  |
|  |                                  |   | 16 C | -0.033 | -0.15  |
|  |                                  |   | 17 C | -0.042 | -0.15  |
|  |                                  |   | 18 C | 0.017  | 0.1    |
|  |                                  |   | 19 C | -0.042 | -0.15  |
|  |                                  |   | 20 C | -0.033 | -0.15  |

|  |                                  |   |      |        |        |
|--|----------------------------------|---|------|--------|--------|
|  |                                  |   | 21 N | -0.281 | -0.838 |
|  |                                  |   | 22 C | -0.009 | 0.369  |
|  |                                  |   | 23 C | -0.009 | 0.369  |
|  | N(CH <sub>3</sub> ) <sub>2</sub> | 2 | 1 N  | -0.15  | -0.179 |
|  |                                  |   | 2 N  | -0.143 | -0.171 |
|  |                                  |   | 3 C  | 0.166  | 0.163  |
|  |                                  |   | 4 C  | 0.211  | 0.153  |
|  |                                  |   | 5 O  | -0.339 | -0.527 |
|  |                                  |   | 6 O  | -0.324 | -0.357 |
|  |                                  |   | 7 C  | 0.053  | 0.28   |
|  |                                  |   | 8 C  | -0.041 | 0      |
|  |                                  |   | 9 C  | 0.095  | 0.318  |
|  |                                  |   | 10 N | -0.254 | -0.62  |
|  |                                  |   | 11 C | 0.028  | 0.16   |
|  |                                  |   | 12 C | -0.044 | -0.15  |
|  |                                  |   | 13 C | -0.058 | -0.15  |
|  |                                  |   | 14 C | -0.034 | -0.15  |
|  |                                  |   | 15 C | 0.086  | 0.179  |
|  |                                  |   | 16 C | -0.033 | -0.15  |
|  |                                  |   | 17 C | -0.042 | -0.15  |
|  |                                  |   | 18 C | 0.017  | 0.1    |
|  |                                  |   | 19 C | -0.042 | -0.15  |
|  |                                  |   | 20 C | -0.033 | -0.15  |
|  |                                  |   | 21 N | -0.281 | -0.838 |
|  |                                  |   | 22 C | -0.009 | 0.369  |
|  |                                  |   | 23 C | -0.009 | 0.369  |
|  | N(CH <sub>3</sub> ) <sub>2</sub> | 3 | 1 N  | -0.15  | -0.179 |
|  |                                  |   | 2 N  | -0.142 | -0.171 |
|  |                                  |   | 3 C  | 0.176  | 0.185  |
|  |                                  |   | 4 C  | 0.315  | 0.706  |
|  |                                  |   | 5 O  | -0.258 | -0.57  |

|                                                                                     |                                  |   |      |        |        |
|-------------------------------------------------------------------------------------|----------------------------------|---|------|--------|--------|
| 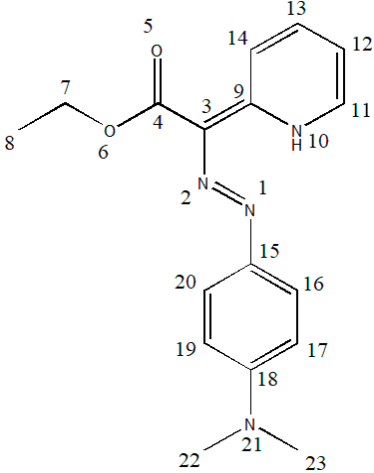   |                                  |   | 6 O  | -0.311 | -0.43  |
|                                                                                     |                                  |   | 7 C  | 0.054  | 0.28   |
|                                                                                     |                                  |   | 8 C  | -0.041 | 0      |
|                                                                                     |                                  |   | 9 C  | 0.053  | 0.1    |
|                                                                                     |                                  |   | 10 N | -0.263 | -0.6   |
|                                                                                     |                                  |   | 11 C | -0.018 | -0.05  |
|                                                                                     |                                  |   | 12 C | -0.051 | -0.15  |
|                                                                                     |                                  |   | 13 C | -0.059 | -0.15  |
|                                                                                     |                                  |   | 14 C | -0.041 | -0.15  |
|                                                                                     |                                  |   | 15 C | 0.086  | 0.179  |
|                                                                                     |                                  |   | 16 C | -0.033 | -0.15  |
|                                                                                     |                                  |   | 17 C | -0.042 | -0.15  |
|                                                                                     |                                  |   | 18 C | 0.017  | 0.1    |
|                                                                                     |                                  |   | 19 C | -0.042 | -0.15  |
|                                                                                     |                                  |   | 20 C | -0.033 | -0.15  |
|                                                                                     |                                  |   | 21 N | -0.281 | -0.838 |
|                                                                                     |                                  |   | 22 C | -0.009 | 0.369  |
|                                                                                     |                                  |   | 23 C | -0.009 | 0.369  |
|  | N(CH <sub>3</sub> ) <sub>2</sub> | 4 | 1 N  | -0.15  | -0.45  |
|                                                                                     |                                  |   | 2 N  | -0.141 | -0.45  |
|                                                                                     |                                  |   | 3 C  | 0.183  | 0.482  |
|                                                                                     |                                  |   | 4 C  | 0.316  | 0.72   |
|                                                                                     |                                  |   | 5 O  | -0.258 | -0.57  |
|                                                                                     |                                  |   | 6 O  | -0.311 | -0.43  |
|                                                                                     |                                  |   | 7 C  | 0.054  | 0.28   |
|                                                                                     |                                  |   | 8 C  | -0.041 | 0      |
|                                                                                     |                                  |   | 9 C  | 0.097  | 0.278  |
|                                                                                     |                                  |   | 10 N | -0.254 | -0.62  |
|                                                                                     |                                  |   | 11 C | 0.028  | 0.16   |
|                                                                                     |                                  |   | 12 C | -0.044 | -0.15  |
|                                                                                     |                                  |   | 13 C | -0.058 | -0.15  |

|                                                                                    |                                  |   |      |        |        |
|------------------------------------------------------------------------------------|----------------------------------|---|------|--------|--------|
|                                                                                    |                                  |   | 14 C | -0.034 | -0.15  |
|                                                                                    |                                  |   | 15 C | 0.085  | 0.421  |
|                                                                                    |                                  |   | 16 C | -0.037 | -0.136 |
|                                                                                    |                                  |   | 17 C | -0.061 | -0.288 |
|                                                                                    |                                  |   | 18 C | 0.047  | 0.546  |
|                                                                                    |                                  |   | 19 C | -0.061 | -0.288 |
|                                                                                    |                                  |   | 20 C | -0.037 | -0.136 |
|                                                                                    |                                  |   | 21 N | -0.299 | -0.81  |
|                                                                                    |                                  |   | 22 C | -0.013 | 0.27   |
|                                                                                    |                                  |   | 23 C | -0.013 | 0.27   |
| 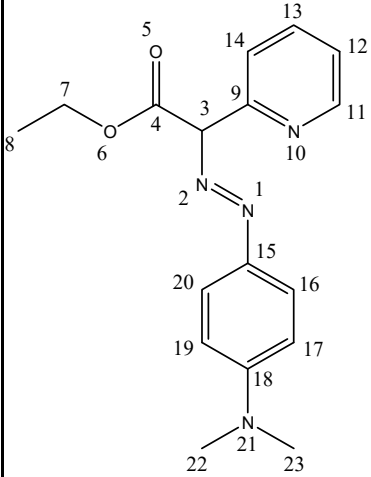 | N(CH <sub>3</sub> ) <sub>2</sub> | 5 | 1 N  | -0.182 | -0.458 |
|                                                                                    |                                  |   | 2 N  | -0.188 | -0.492 |
|                                                                                    |                                  |   | 3 C  | 0.175  | 0.482  |
|                                                                                    |                                  |   | 4 C  | 0.315  | 0.72   |
|                                                                                    |                                  |   | 5 O  | -0.258 | -0.57  |
|                                                                                    |                                  |   | 6 O  | -0.311 | -0.43  |
|                                                                                    |                                  |   | 7 C  | 0.054  | 0.28   |
|                                                                                    |                                  |   | 8 C  | -0.041 | 0      |
|                                                                                    |                                  |   | 9 C  | 0.096  | 0.278  |
|                                                                                    |                                  |   | 10 N | -0.254 | -0.62  |
|                                                                                    |                                  |   | 11 C | 0.028  | 0.16   |
|                                                                                    |                                  |   | 12 C | -0.044 | -0.15  |
|                                                                                    |                                  |   | 13 C | -0.058 | -0.15  |
|                                                                                    |                                  |   | 14 C | -0.034 | -0.15  |
|                                                                                    |                                  |   | 15 C | 0.036  | 0.1    |
|                                                                                    |                                  |   | 16 C | -0.041 | -0.15  |
|                                                                                    |                                  |   | 17 C | -0.042 | -0.15  |
|                                                                                    |                                  |   | 18 C | 0.017  | 0.1    |
|                                                                                    |                                  |   | 19 C | -0.042 | -0.15  |
|                                                                                    |                                  |   | 20 C | -0.041 | -0.15  |
|                                                                                    |                                  |   | 21 N | -0.281 | -0.838 |

|                                                                                   |                                  |   |      |        |        |
|-----------------------------------------------------------------------------------|----------------------------------|---|------|--------|--------|
|                                                                                   |                                  |   | 22 C | -0.009 | 0.369  |
|                                                                                   |                                  |   | 23 C | -0.009 | 0.369  |
| 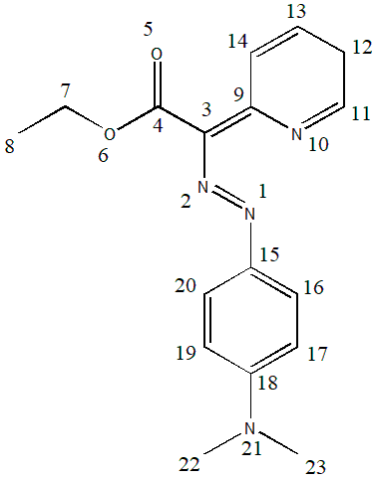 | N(CH <sub>3</sub> ) <sub>2</sub> | 6 | 1 N  | -0.15  | -0.179 |
|                                                                                   |                                  |   | 2 N  | -0.141 | -0.171 |
|                                                                                   |                                  |   | 3 C  | 0.183  | 0.185  |
|                                                                                   |                                  |   | 4 C  | 0.316  | 0.706  |
|                                                                                   |                                  |   | 5 O  | -0.258 | -0.57  |
|                                                                                   |                                  |   | 6 O  | -0.311 | -0.43  |
|                                                                                   |                                  |   | 7 C  | 0.054  | 0.28   |
|                                                                                   |                                  |   | 8 C  | -0.041 | 0      |
|                                                                                   |                                  |   | 9 C  | 0.096  | 0.171  |
|                                                                                   |                                  |   | 10 N | -0.258 | -0.621 |
|                                                                                   |                                  |   | 11 C | 0.009  | 0.329  |
|                                                                                   |                                  |   | 12 C | 0.001  | 0.199  |
|                                                                                   |                                  |   | 13 C | -0.077 | -0.288 |
|                                                                                   |                                  |   | 14 C | -0.038 | -0.15  |
|                                                                                   |                                  |   | 15 C | 0.086  | 0.179  |
|                                                                                   |                                  |   | 16 C | -0.033 | -0.15  |
|                                                                                   |                                  |   | 17 C | -0.042 | -0.15  |
|                                                                                   |                                  |   | 18 C | 0.017  | 0.1    |
|                                                                                   |                                  |   | 19 C | -0.042 | -0.15  |
|                                                                                   |                                  |   | 20 C | -0.033 | -0.15  |
|                                                                                   |                                  |   | 21 N | -0.281 | -0.838 |
|                                                                                   |                                  |   | 22 C | -0.009 | 0.369  |
|                                                                                   |                                  |   | 23 C | -0.009 | 0.369  |
|                                                                                   | N(CH <sub>3</sub> ) <sub>2</sub> | 7 | 1 N  | -0.154 | -0.45  |
|                                                                                   |                                  |   | 2 N  | -0.142 | -0.45  |
|                                                                                   |                                  |   | 3 C  | 0.183  | 0.482  |
|                                                                                   |                                  |   | 4 C  | 0.316  | 0.72   |
|                                                                                   |                                  |   | 5 O  | -0.258 | -0.57  |
|                                                                                   |                                  |   | 6 O  | -0.311 | -0.43  |

|                                                                                     |                                  |   |      |        |        |
|-------------------------------------------------------------------------------------|----------------------------------|---|------|--------|--------|
| 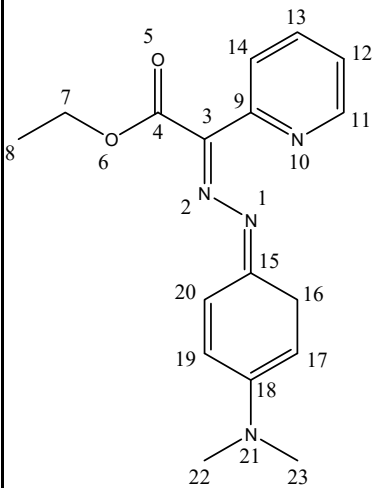   |                                  |   | 7 C  | 0.054  | 0.28   |
|                                                                                     |                                  |   | 8 C  | -0.041 | 0      |
|                                                                                     |                                  |   | 9 C  | 0.097  | 0.278  |
|                                                                                     |                                  |   | 10 N | -0.254 | -0.62  |
|                                                                                     |                                  |   | 11 C | 0.028  | 0.16   |
|                                                                                     |                                  |   | 12 C | -0.044 | -0.15  |
|                                                                                     |                                  |   | 13 C | -0.058 | -0.15  |
|                                                                                     |                                  |   | 14 C | -0.034 | -0.15  |
|                                                                                     |                                  |   | 15 C | 0.067  | 0.375  |
|                                                                                     |                                  |   | 16 C | -0.037 | -0.136 |
|                                                                                     |                                  |   | 17 C | -0.042 | -0.15  |
|                                                                                     |                                  |   | 18 C | 0.014  | 0.1    |
|                                                                                     |                                  |   | 19 C | -0.06  | -0.288 |
|                                                                                     |                                  |   | 20 C | 0.011  | 0.199  |
|                                                                                     |                                  |   | 21 N | -0.281 | -0.838 |
|                                                                                     |                                  |   | 22 C | -0.009 | 0.369  |
|                                                                                     |                                  |   | 23 C | -0.009 | 0.369  |
|  | N(CH <sub>3</sub> ) <sub>2</sub> | 8 | 1 N  | -0.15  | -0.179 |
|                                                                                     |                                  |   | 2 N  | -0.142 | -0.171 |
|                                                                                     |                                  |   | 3 C  | 0.179  | 0.185  |
|                                                                                     |                                  |   | 4 C  | 0.316  | 0.706  |
|                                                                                     |                                  |   | 5 O  | -0.258 | -0.57  |
|                                                                                     |                                  |   | 6 O  | -0.311 | -0.43  |
|                                                                                     |                                  |   | 7 C  | 0.054  | 0.28   |
|                                                                                     |                                  |   | 8 C  | -0.041 | 0      |
|                                                                                     |                                  |   | 9 C  | 0.078  | 0.033  |
|                                                                                     |                                  |   | 10 N | -0.258 | -0.621 |
|                                                                                     |                                  |   | 11 C | 0.027  | 0.376  |
|                                                                                     |                                  |   | 12 C | -0.047 | -0.136 |
|                                                                                     |                                  |   | 13 C | -0.077 | -0.288 |
|                                                                                     |                                  |   | 14 C | 0.01   | 0.276  |

|                                                                                    |    |   |       |        |        |
|------------------------------------------------------------------------------------|----|---|-------|--------|--------|
|                                                                                    |    |   | 15 C  | 0.086  | 0.179  |
|                                                                                    |    |   | 16 C  | -0.033 | -0.15  |
|                                                                                    |    |   | 17 C  | -0.042 | -0.15  |
|                                                                                    |    |   | 18 C  | 0.017  | 0.1    |
|                                                                                    |    |   | 19 C  | -0.042 | -0.15  |
|                                                                                    |    |   | 20 C  | -0.033 | -0.15  |
|                                                                                    |    |   | 21 N  | -0.281 | -0.838 |
|                                                                                    |    |   | 22 C  | -0.009 | 0.369  |
|                                                                                    |    |   | 23 C  | -0.009 | 0.369  |
| 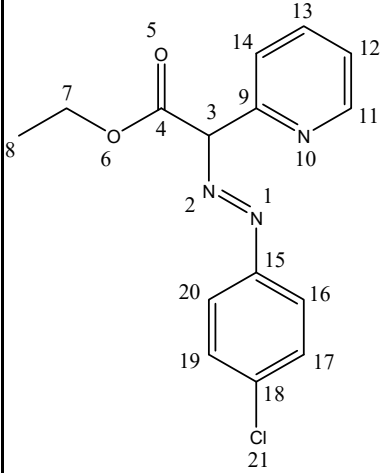 | Cl | 1 | 1 N   | -0.154 | -0.179 |
|                                                                                    |    |   | 2 N   | -0.168 | -0.246 |
|                                                                                    |    |   | 3 C   | 0.198  | 0.451  |
|                                                                                    |    |   | 4 C   | 0.294  | 0.659  |
|                                                                                    |    |   | 5 O   | -0.263 | -0.57  |
|                                                                                    |    |   | 6 O   | -0.314 | -0.43  |
|                                                                                    |    |   | 7 C   | 0.054  | 0.28   |
|                                                                                    |    |   | 8 C   | -0.041 | 0      |
|                                                                                    |    |   | 9 C   | 0.077  | 0.167  |
|                                                                                    |    |   | 10 N  | -0.258 | -0.62  |
|                                                                                    |    |   | 11 C  | 0.028  | 0.16   |
|                                                                                    |    |   | 12 C  | -0.044 | -0.15  |
|                                                                                    |    |   | 13 C  | -0.059 | -0.15  |
|                                                                                    |    |   | 14 C  | -0.038 | -0.15  |
|                                                                                    |    |   | 15 C  | 0.086  | 0.179  |
|                                                                                    |    |   | 16 C  | -0.033 | -0.15  |
|                                                                                    |    |   | 17 C  | -0.035 | -0.15  |
|                                                                                    |    |   | 18 C  | 0.073  | 0.177  |
|                                                                                    |    |   | 19 C  | -0.035 | -0.15  |
|                                                                                    |    |   | 20 C  | -0.033 | -0.15  |
|                                                                                    |    |   | 21 Cl | -0.13  | -0.177 |
|                                                                                    |    |   | 1 N   | -0.15  | -0.179 |



|                                                                                     |    |   |       |        |        |
|-------------------------------------------------------------------------------------|----|---|-------|--------|--------|
| 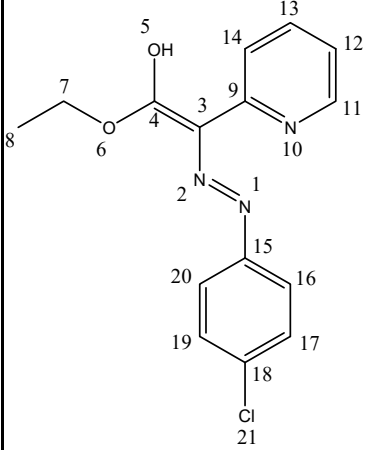  | Cl | 2 | 2 N   | -0.143 | -0.171 |
|                                                                                     |    |   | 3 C   | 0.166  | 0.163  |
|                                                                                     |    |   | 4 C   | 0.211  | 0.153  |
|                                                                                     |    |   | 5 O   | -0.339 | -0.527 |
|                                                                                     |    |   | 6 O   | -0.324 | -0.357 |
|                                                                                     |    |   | 7 C   | 0.053  | 0.28   |
|                                                                                     |    |   | 8 C   | -0.041 | 0      |
|                                                                                     |    |   | 9 C   | 0.095  | 0.318  |
|                                                                                     |    |   | 10 N  | -0.254 | -0.62  |
|                                                                                     |    |   | 11 C  | 0.028  | 0.16   |
|                                                                                     |    |   | 12 C  | -0.044 | -0.15  |
|                                                                                     |    |   | 13 C  | -0.058 | -0.15  |
|                                                                                     |    |   | 14 C  | -0.034 | -0.15  |
|                                                                                     |    |   | 15 C  | 0.086  | 0.179  |
|                                                                                     |    |   | 16 C  | -0.033 | -0.15  |
|                                                                                     |    |   | 17 C  | -0.035 | -0.15  |
|                                                                                     |    |   | 18 C  | 0.073  | 0.177  |
|                                                                                     |    |   | 19 C  | -0.035 | -0.15  |
|                                                                                     |    |   | 20 C  | -0.033 | -0.15  |
|                                                                                     |    |   | 21 Cl | -0.13  | -0.177 |
|  | Cl | 3 | 1 N   | -0.15  | -0.179 |
|                                                                                     |    |   | 2 N   | -0.142 | -0.171 |
|                                                                                     |    |   | 3 C   | 0.176  | 0.185  |
|                                                                                     |    |   | 4 C   | 0.315  | 0.706  |
|                                                                                     |    |   | 5 O   | -0.258 | -0.57  |
|                                                                                     |    |   | 6 O   | -0.311 | -0.43  |
|                                                                                     |    |   | 7 C   | 0.054  | 0.28   |
|                                                                                     |    |   | 8 C   | -0.041 | 0      |
|                                                                                     |    |   | 9 C   | 0.053  | 0.1    |
|                                                                                     |    |   | 10 N  | -0.263 | -0.6   |
|                                                                                     |    |   | 11 C  | -0.018 | -0.05  |

|                                                                                    |    |   |       |        |        |
|------------------------------------------------------------------------------------|----|---|-------|--------|--------|
|                                                                                    |    |   | 12 C  | -0.051 | -0.15  |
|                                                                                    |    |   | 13 C  | -0.059 | -0.15  |
|                                                                                    |    |   | 14 C  | -0.041 | -0.15  |
|                                                                                    |    |   | 15 C  | 0.086  | 0.179  |
|                                                                                    |    |   | 16 C  | -0.033 | -0.15  |
|                                                                                    |    |   | 17 C  | -0.035 | -0.15  |
|                                                                                    |    |   | 18 C  | 0.073  | 0.177  |
|                                                                                    |    |   | 19 C  | -0.035 | -0.15  |
|                                                                                    |    |   | 20 C  | -0.033 | -0.15  |
|                                                                                    |    |   | 21 Cl | -0.13  | -0.177 |
| 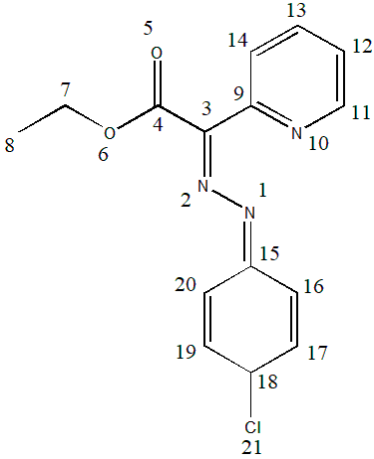 | Cl | 4 | 1 N   | -0.15  | -0.45  |
|                                                                                    |    |   | 2 N   | -0.141 | -0.45  |
|                                                                                    |    |   | 3 C   | 0.183  | 0.482  |
|                                                                                    |    |   | 4 C   | 0.316  | 0.72   |
|                                                                                    |    |   | 5 O   | -0.258 | -0.57  |
|                                                                                    |    |   | 6 O   | -0.311 | -0.43  |
|                                                                                    |    |   | 7 C   | 0.054  | 0.28   |
|                                                                                    |    |   | 8 C   | -0.041 | 0      |
|                                                                                    |    |   | 9 C   | 0.097  | 0.278  |
|                                                                                    |    |   | 10 N  | -0.254 | -0.62  |
|                                                                                    |    |   | 11 C  | 0.028  | 0.16   |
|                                                                                    |    |   | 12 C  | -0.044 | -0.15  |
|                                                                                    |    |   | 13 C  | -0.058 | -0.15  |
|                                                                                    |    |   | 14 C  | -0.034 | -0.15  |
|                                                                                    |    |   | 15 C  | 0.085  | 0.421  |
|                                                                                    |    |   | 16 C  | -0.036 | -0.136 |
|                                                                                    |    |   | 17 C  | -0.055 | -0.288 |
|                                                                                    |    |   | 18 C  | 0.097  | 0.566  |
|                                                                                    |    |   | 19 C  | -0.055 | -0.288 |
|                                                                                    |    |   | 20 C  | -0.036 | -0.136 |
|                                                                                    |    |   | 21 Cl | -0.161 | -0.29  |

|                                                                                     |    |   |       |        |        |
|-------------------------------------------------------------------------------------|----|---|-------|--------|--------|
| 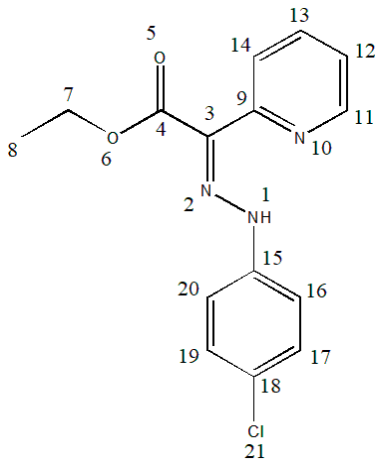   | Cl | 5 | 1 N   | -0.182 | -0.458 |
|                                                                                     |    |   | 2 N   | -0.188 | -0.492 |
|                                                                                     |    |   | 3 C   | 0.175  | 0.482  |
|                                                                                     |    |   | 4 C   | 0.315  | 0.72   |
|                                                                                     |    |   | 5 O   | -0.258 | -0.57  |
|                                                                                     |    |   | 6 O   | -0.311 | -0.43  |
|                                                                                     |    |   | 7 C   | 0.054  | 0.28   |
|                                                                                     |    |   | 8 C   | -0.041 | 0      |
|                                                                                     |    |   | 9 C   | 0.096  | 0.278  |
|                                                                                     |    |   | 10 N  | -0.254 | -0.62  |
|                                                                                     |    |   | 11 C  | 0.028  | 0.16   |
|                                                                                     |    |   | 12 C  | -0.044 | -0.15  |
|                                                                                     |    |   | 13 C  | -0.058 | -0.15  |
|                                                                                     |    |   | 14 C  | -0.034 | -0.15  |
|                                                                                     |    |   | 15 C  | 0.036  | 0.1    |
|                                                                                     |    |   | 16 C  | -0.04  | -0.15  |
|                                                                                     |    |   | 17 C  | -0.036 | -0.15  |
|                                                                                     |    |   | 18 C  | 0.073  | 0.177  |
|                                                                                     |    |   | 19 C  | -0.036 | -0.15  |
|                                                                                     |    |   | 20 C  | -0.04  | -0.15  |
|                                                                                     |    |   | 21 Cl | -0.13  | -0.177 |
|  | Cl | 6 | 1 N   | -0.15  | -0.179 |
|                                                                                     |    |   | 2 N   | -0.141 | -0.171 |
|                                                                                     |    |   | 3 C   | 0.183  | 0.185  |
|                                                                                     |    |   | 4 C   | 0.316  | 0.706  |
|                                                                                     |    |   | 5 O   | -0.258 | -0.57  |
|                                                                                     |    |   | 6 O   | -0.311 | -0.43  |
|                                                                                     |    |   | 7 C   | 0.054  | 0.28   |
|                                                                                     |    |   | 8 C   | -0.041 | 0      |
|                                                                                     |    |   | 9 C   | 0.096  | 0.171  |
|                                                                                     |    |   | 10 N  | -0.258 | -0.621 |

|                                                                                    |    |   |       |        |        |
|------------------------------------------------------------------------------------|----|---|-------|--------|--------|
|                                                                                    |    |   | 11 C  | 0.009  | 0.329  |
|                                                                                    |    |   | 12 C  | 0.001  | 0.199  |
|                                                                                    |    |   | 13 C  | -0.077 | -0.288 |
|                                                                                    |    |   | 14 C  | -0.038 | -0.15  |
|                                                                                    |    |   | 15 C  | 0.086  | 0.179  |
|                                                                                    |    |   | 16 C  | -0.033 | -0.15  |
|                                                                                    |    |   | 17 C  | -0.035 | -0.15  |
|                                                                                    |    |   | 18 C  | 0.073  | 0.177  |
|                                                                                    |    |   | 19 C  | -0.035 | -0.15  |
|                                                                                    |    |   | 20 C  | -0.033 | -0.15  |
|                                                                                    |    |   | 21 Cl | -0.13  | -0.177 |
| 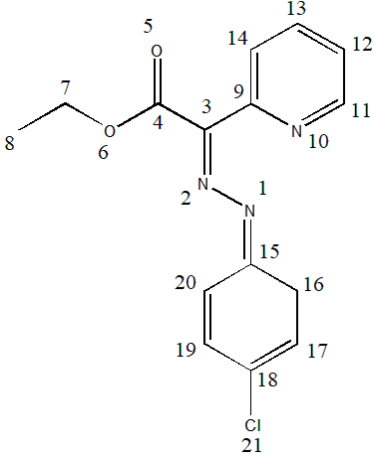 | Cl | 7 | 1 N   | -0.154 | -0.45  |
|                                                                                    |    |   | 2 N   | -0.142 | -0.45  |
|                                                                                    |    |   | 3 C   | 0.183  | 0.482  |
|                                                                                    |    |   | 4 C   | 0.316  | 0.72   |
|                                                                                    |    |   | 5 O   | -0.258 | -0.57  |
|                                                                                    |    |   | 6 O   | -0.311 | -0.43  |
|                                                                                    |    |   | 7 C   | 0.054  | 0.28   |
|                                                                                    |    |   | 8 C   | -0.041 | 0      |
|                                                                                    |    |   | 9 C   | 0.097  | 0.278  |
|                                                                                    |    |   | 10 N  | -0.254 | -0.62  |
|                                                                                    |    |   | 11 C  | 0.028  | 0.16   |
|                                                                                    |    |   | 12 C  | -0.044 | -0.15  |
|                                                                                    |    |   | 13 C  | -0.058 | -0.15  |
|                                                                                    |    |   | 14 C  | -0.034 | -0.15  |
|                                                                                    |    |   | 15 C  | 0.067  | 0.375  |
|                                                                                    |    |   | 16 C  | -0.036 | -0.136 |
|                                                                                    |    |   | 17 C  | -0.036 | -0.15  |
|                                                                                    |    |   | 18 C  | 0.069  | 0.14   |
|                                                                                    |    |   | 19 C  | -0.054 | -0.288 |
|                                                                                    |    |   | 20 C  | 0.012  | 0.199  |

|                                                                                   |                 |   |       |        |        |
|-----------------------------------------------------------------------------------|-----------------|---|-------|--------|--------|
|                                                                                   |                 |   | 21 Cl | -0.131 | -0.14  |
| 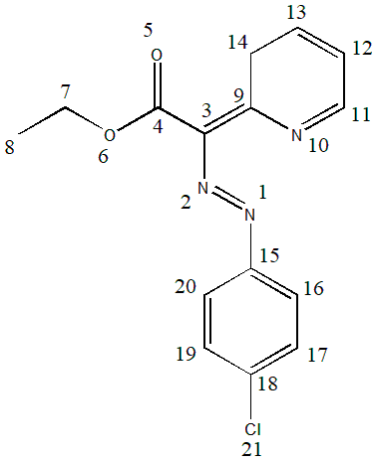 | Cl              | 8 | 1 N   | -0.15  | -0.179 |
|                                                                                   |                 |   | 2 N   | -0.142 | -0.171 |
|                                                                                   |                 |   | 3 C   | 0.179  | 0.185  |
|                                                                                   |                 |   | 4 C   | 0.316  | 0.706  |
|                                                                                   |                 |   | 5 O   | -0.258 | -0.57  |
|                                                                                   |                 |   | 6 O   | -0.311 | -0.43  |
|                                                                                   |                 |   | 7 C   | 0.054  | 0.28   |
|                                                                                   |                 |   | 8 C   | -0.041 | 0      |
|                                                                                   |                 |   | 9 C   | 0.078  | 0.033  |
|                                                                                   |                 |   | 10 N  | -0.258 | -0.621 |
|                                                                                   |                 |   | 11 C  | 0.027  | 0.376  |
|                                                                                   |                 |   | 12 C  | -0.047 | -0.136 |
|                                                                                   |                 |   | 13 C  | -0.077 | -0.288 |
|                                                                                   |                 |   | 14 C  | 0.01   | 0.276  |
|                                                                                   |                 |   | 15 C  | 0.086  | 0.179  |
|                                                                                   |                 |   | 16 C  | -0.033 | -0.15  |
|                                                                                   |                 |   | 17 C  | -0.035 | -0.15  |
|                                                                                   |                 |   | 18 C  | 0.073  | 0.177  |
|                                                                                   |                 |   | 19 C  | -0.035 | -0.15  |
|                                                                                   |                 |   | 20 C  | -0.033 | -0.15  |
|                                                                                   |                 |   | 21 Cl | -0.13  | -0.177 |
|                                                                                   | NO <sub>2</sub> | 1 | 1 N   | -0.154 | -0.179 |
|                                                                                   |                 |   | 2 N   | -0.168 | -0.246 |
|                                                                                   |                 |   | 3 C   | 0.198  | 0.451  |
|                                                                                   |                 |   | 4 C   | 0.294  | 0.659  |
|                                                                                   |                 |   | 5 O   | -0.263 | -0.57  |
|                                                                                   |                 |   | 6 O   | -0.314 | -0.43  |
|                                                                                   |                 |   | 7 C   | 0.054  | 0.28   |
|                                                                                   |                 |   | 8 C   | -0.041 | 0      |
|                                                                                   |                 |   | 9 C   | 0.077  | 0.167  |

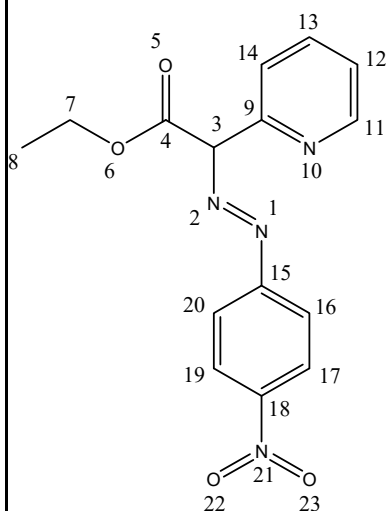

|      |        |       |
|------|--------|-------|
| 10 N | -0.258 | -0.62 |
| 11 C | 0.028  | 0.16  |
| 12 C | -0.044 | -0.15 |
| 13 C | -0.059 | -0.15 |
| 14 C | -0.038 | -0.15 |
| 15 C | 0.086  | 0.179 |
| 16 C | -0.032 | -0.15 |
| 17 C | -0.029 | -0.15 |
| 18 C | 0.127  | 0.133 |
| 19 C | -0.029 | -0.15 |
| 20 C | -0.032 | -0.15 |
| 21 N | 0.056  | 0.907 |
| 22 O | -0.127 | -0.52 |
| 23 O | -0.127 | -0.52 |

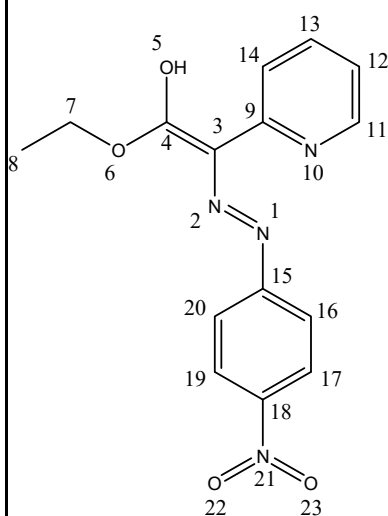

|                 |   |      |        |        |
|-----------------|---|------|--------|--------|
| NO <sub>2</sub> | 2 | 1 N  | -0.15  | -0.179 |
|                 |   | 2 N  | -0.143 | -0.171 |
|                 |   | 3 C  | 0.166  | 0.163  |
|                 |   | 4 C  | 0.211  | 0.153  |
|                 |   | 5 O  | -0.339 | -0.527 |
|                 |   | 6 O  | -0.324 | -0.357 |
|                 |   | 7 C  | 0.053  | 0.28   |
|                 |   | 8 C  | -0.041 | 0      |
|                 |   | 9 C  | 0.095  | 0.318  |
|                 |   | 10 N | -0.254 | -0.62  |
|                 |   | 11 C | 0.028  | 0.16   |
|                 |   | 12 C | -0.044 | -0.15  |
|                 |   | 13 C | -0.058 | -0.15  |
|                 |   | 14 C | -0.034 | -0.15  |
|                 |   | 15 C | 0.086  | 0.179  |
|                 |   | 16 C | -0.032 | -0.15  |
|                 |   | 17 C | -0.029 | -0.15  |

|                                                                                    |                 |   |      |        |        |
|------------------------------------------------------------------------------------|-----------------|---|------|--------|--------|
|                                                                                    |                 |   | 18 C | 0.127  | 0.133  |
|                                                                                    |                 |   | 19 C | -0.029 | -0.15  |
|                                                                                    |                 |   | 20 C | -0.032 | -0.15  |
|                                                                                    |                 |   | 21 N | 0.056  | 0.907  |
|                                                                                    |                 |   | 22 O | -0.127 | -0.52  |
|                                                                                    |                 |   | 23 O | -0.127 | -0.52  |
| 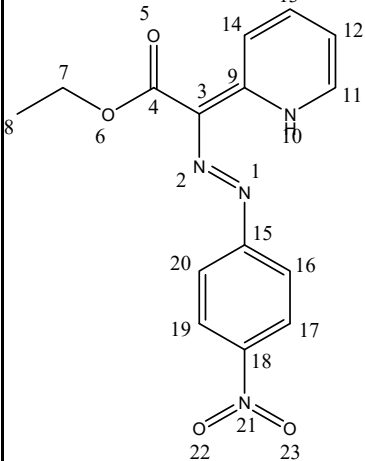 | NO <sub>2</sub> | 3 | 1 N  | -0.15  | -0.179 |
|                                                                                    |                 |   | 2 N  | -0.142 | -0.171 |
|                                                                                    |                 |   | 3 C  | 0.176  | 0.185  |
|                                                                                    |                 |   | 4 C  | 0.315  | 0.706  |
|                                                                                    |                 |   | 5 O  | -0.258 | -0.57  |
|                                                                                    |                 |   | 6 O  | -0.311 | -0.43  |
|                                                                                    |                 |   | 7 C  | 0.054  | 0.28   |
|                                                                                    |                 |   | 8 C  | -0.041 | 0      |
|                                                                                    |                 |   | 9 C  | 0.053  | 0.1    |
|                                                                                    |                 |   | 10 N | -0.263 | -0.6   |
|                                                                                    |                 |   | 11 C | -0.018 | -0.05  |
|                                                                                    |                 |   | 12 C | -0.051 | -0.15  |
|                                                                                    |                 |   | 13 C | -0.059 | -0.15  |
|                                                                                    |                 |   | 14 C | -0.041 | -0.15  |
|                                                                                    |                 |   | 15 C | 0.086  | 0.179  |
|                                                                                    |                 |   | 16 C | -0.032 | -0.15  |
|                                                                                    |                 |   | 17 C | -0.029 | -0.15  |
|                                                                                    |                 |   | 18 C | 0.127  | 0.133  |
|                                                                                    |                 |   | 19 C | -0.029 | -0.15  |
|                                                                                    |                 |   | 20 C | -0.032 | -0.15  |
|                                                                                    |                 |   | 21 N | 0.056  | 0.907  |
|                                                                                    |                 |   | 22 O | -0.127 | -0.52  |
|                                                                                    |                 |   | 23 O | -0.127 | -0.52  |
|                                                                                    | NO <sub>2</sub> | 4 | 1 N  | -0.15  | -0.45  |
|                                                                                    |                 |   | 2 N  | -0.141 | -0.45  |

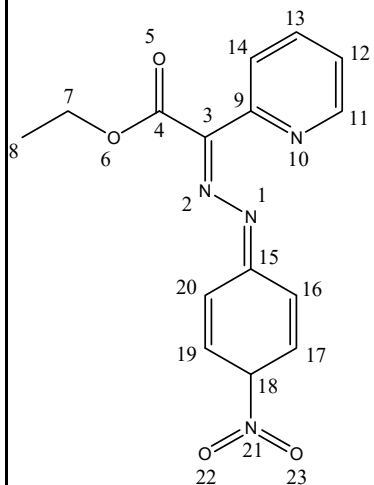

|      |        |        |
|------|--------|--------|
| 3 C  | 0.183  | 0.482  |
| 4 C  | 0.316  | 0.72   |
| 5 O  | -0.258 | -0.57  |
| 6 O  | -0.311 | -0.43  |
| 7 C  | 0.054  | 0.28   |
| 8 C  | -0.041 | 0      |
| 9 C  | 0.097  | 0.278  |
| 10 N | -0.254 | -0.62  |
| 11 C | 0.028  | 0.16   |
| 12 C | -0.044 | -0.15  |
| 13 C | -0.058 | -0.15  |
| 14 C | -0.034 | -0.15  |
| 15 C | 0.085  | 0.421  |
| 16 C | -0.036 | -0.136 |
| 17 C | -0.049 | -0.288 |
| 18 C | 0.147  | 0.517  |
| 19 C | -0.049 | -0.288 |
| 20 C | -0.036 | -0.136 |
| 21 N | 0.033  | 0.8    |
| 22 O | -0.131 | -0.52  |
| 23 O | -0.131 | -0.52  |

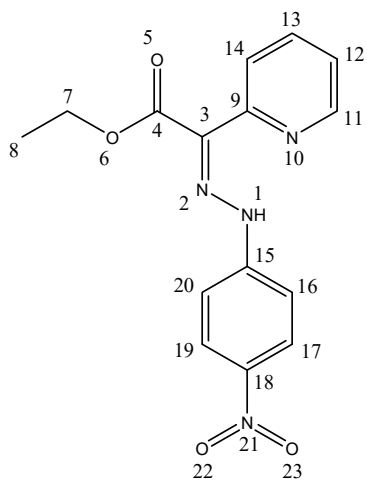

|                 |   |      |        |        |
|-----------------|---|------|--------|--------|
| NO <sub>2</sub> | 5 | 1 N  | -0.182 | -0.458 |
|                 |   | 2 N  | -0.188 | -0.492 |
|                 |   | 3 C  | 0.175  | 0.482  |
|                 |   | 4 C  | 0.315  | 0.72   |
|                 |   | 5 O  | -0.258 | -0.57  |
|                 |   | 6 O  | -0.311 | -0.43  |
|                 |   | 7 C  | 0.054  | 0.28   |
|                 |   | 8 C  | -0.041 | 0      |
|                 |   | 9 C  | 0.096  | 0.278  |
|                 |   | 10 N | -0.254 | -0.62  |



|                                                                                    |                 |   |      |        |        |
|------------------------------------------------------------------------------------|-----------------|---|------|--------|--------|
|                                                                                    |                 |   | 11 C | 0.028  | 0.16   |
|                                                                                    |                 |   | 12 C | -0.044 | -0.15  |
|                                                                                    |                 |   | 13 C | -0.058 | -0.15  |
|                                                                                    |                 |   | 14 C | -0.034 | -0.15  |
|                                                                                    |                 |   | 15 C | 0.036  | 0.1    |
|                                                                                    |                 |   | 16 C | -0.04  | -0.15  |
|                                                                                    |                 |   | 17 C | -0.03  | -0.15  |
|                                                                                    |                 |   | 18 C | 0.127  | 0.133  |
|                                                                                    |                 |   | 19 C | -0.03  | -0.15  |
|                                                                                    |                 |   | 20 C | -0.04  | -0.15  |
|                                                                                    |                 |   | 21 N | 0.056  | 0.907  |
|                                                                                    |                 |   | 22 O | -0.127 | -0.52  |
|                                                                                    |                 |   | 23 O | -0.127 | -0.52  |
| 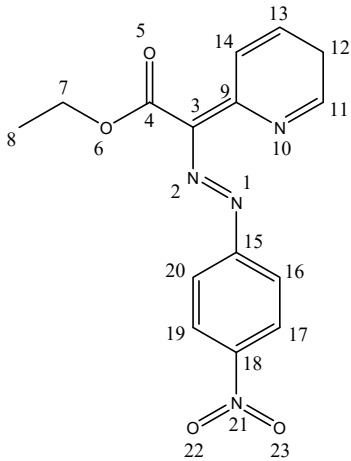 | NO <sub>2</sub> | 6 | 1 N  | -0.15  | -0.179 |
|                                                                                    |                 |   | 2 N  | -0.141 | -0.171 |
|                                                                                    |                 |   | 3 C  | 0.183  | 0.185  |
|                                                                                    |                 |   | 4 C  | 0.316  | 0.706  |
|                                                                                    |                 |   | 5 O  | -0.258 | -0.57  |
|                                                                                    |                 |   | 6 O  | -0.311 | -0.43  |
|                                                                                    |                 |   | 7 C  | 0.054  | 0.28   |
|                                                                                    |                 |   | 8 C  | -0.041 | 0      |
|                                                                                    |                 |   | 9 C  | 0.096  | 0.171  |
|                                                                                    |                 |   | 10 N | -0.258 | -0.621 |
|                                                                                    |                 |   | 11 C | 0.009  | 0.329  |
|                                                                                    |                 |   | 12 C | 0.001  | 0.199  |
|                                                                                    |                 |   | 13 C | -0.077 | -0.288 |
|                                                                                    |                 |   | 14 C | -0.038 | -0.15  |
|                                                                                    |                 |   | 15 C | 0.086  | 0.179  |
|                                                                                    |                 |   | 16 C | -0.032 | -0.15  |
|                                                                                    |                 |   | 17 C | -0.029 | -0.15  |
|                                                                                    |                 |   | 18 C | 0.127  | 0.133  |

|                                                                                   |                 |   |      |        |        |
|-----------------------------------------------------------------------------------|-----------------|---|------|--------|--------|
|                                                                                   |                 |   | 19 C | -0.029 | -0.15  |
|                                                                                   |                 |   | 20 C | -0.032 | -0.15  |
|                                                                                   |                 |   | 21 N | 0.056  | 0.907  |
|                                                                                   |                 |   | 22 O | -0.127 | -0.52  |
|                                                                                   |                 |   | 23 O | -0.127 | -0.52  |
| 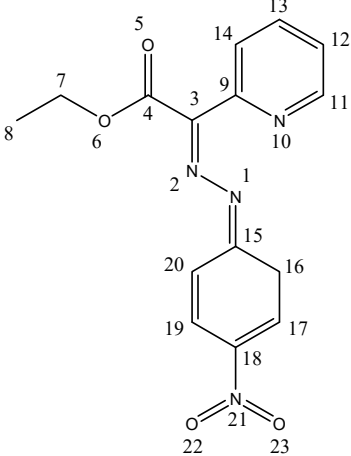 | NO <sub>2</sub> | 7 | 1 N  | -0.154 | -0.45  |
|                                                                                   |                 |   | 2 N  | -0.142 | -0.45  |
|                                                                                   |                 |   | 3 C  | 0.183  | 0.482  |
|                                                                                   |                 |   | 4 C  | 0.316  | 0.72   |
|                                                                                   |                 |   | 5 O  | -0.258 | -0.57  |
|                                                                                   |                 |   | 6 O  | -0.311 | -0.43  |
|                                                                                   |                 |   | 7 C  | 0.054  | 0.28   |
|                                                                                   |                 |   | 8 C  | -0.041 | 0      |
|                                                                                   |                 |   | 9 C  | 0.097  | 0.278  |
|                                                                                   |                 |   | 10 N | -0.254 | -0.62  |
|                                                                                   |                 |   | 11 C | 0.028  | 0.16   |
|                                                                                   |                 |   | 12 C | -0.044 | -0.15  |
|                                                                                   |                 |   | 13 C | -0.058 | -0.15  |
|                                                                                   |                 |   | 14 C | -0.034 | -0.15  |
|                                                                                   |                 |   | 15 C | 0.067  | 0.375  |
|                                                                                   |                 |   | 16 C | 0.012  | 0.199  |
|                                                                                   |                 |   | 17 C | -0.048 | -0.288 |
|                                                                                   |                 |   | 18 C | 0.123  | 0.204  |
|                                                                                   |                 |   | 19 C | -0.03  | -0.15  |
|                                                                                   |                 |   | 20 C | -0.036 | -0.136 |
|                                                                                   |                 |   | 21 N | 0.056  | 0.836  |
|                                                                                   |                 |   | 22 O | -0.127 | -0.52  |
|                                                                                   |                 |   | 23 O | -0.127 | -0.52  |
|                                                                                   | NO <sub>2</sub> | 8 | 1 N  | -0.15  | -0.179 |
|                                                                                   |                 |   | 2 N  | -0.142 | -0.171 |
|                                                                                   |                 |   | 3 C  | 0.179  | 0.185  |

|                                                                                    |  |  |      |        |        |
|------------------------------------------------------------------------------------|--|--|------|--------|--------|
| 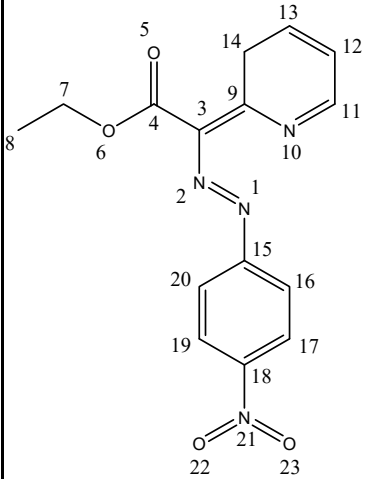 |  |  | 4 C  | 0.316  | 0.706  |
|                                                                                    |  |  | 5 O  | -0.258 | -0.57  |
|                                                                                    |  |  | 6 O  | -0.311 | -0.43  |
|                                                                                    |  |  | 7 C  | 0.054  | 0.28   |
|                                                                                    |  |  | 8 C  | -0.041 | 0      |
|                                                                                    |  |  | 9 C  | 0.078  | 0.033  |
|                                                                                    |  |  | 10 N | -0.258 | -0.621 |
|                                                                                    |  |  | 11 C | 0.027  | 0.376  |
|                                                                                    |  |  | 12 C | -0.047 | -0.136 |
|                                                                                    |  |  | 13 C | -0.077 | -0.288 |
|                                                                                    |  |  | 14 C | 0.01   | 0.276  |
|                                                                                    |  |  | 15 C | 0.086  | 0.179  |
|                                                                                    |  |  | 16 C | -0.032 | -0.15  |
|                                                                                    |  |  | 17 C | -0.029 | -0.15  |
|                                                                                    |  |  | 18 C | 0.127  | 0.133  |
|                                                                                    |  |  | 19 C | -0.029 | -0.15  |
|                                                                                    |  |  | 20 C | -0.032 | -0.15  |
|                                                                                    |  |  | 21 N | 0.056  | 0.907  |
|                                                                                    |  |  | 22 O | -0.127 | -0.52  |
|                                                                                    |  |  | 23 O | -0.127 | -0.52  |
